# Supplementary material
Source: publisher site journal article supplement (https://www.dovepress.com/article/440826)
Supplement: Supplementary file 1 [file get_supplementary_file.php]

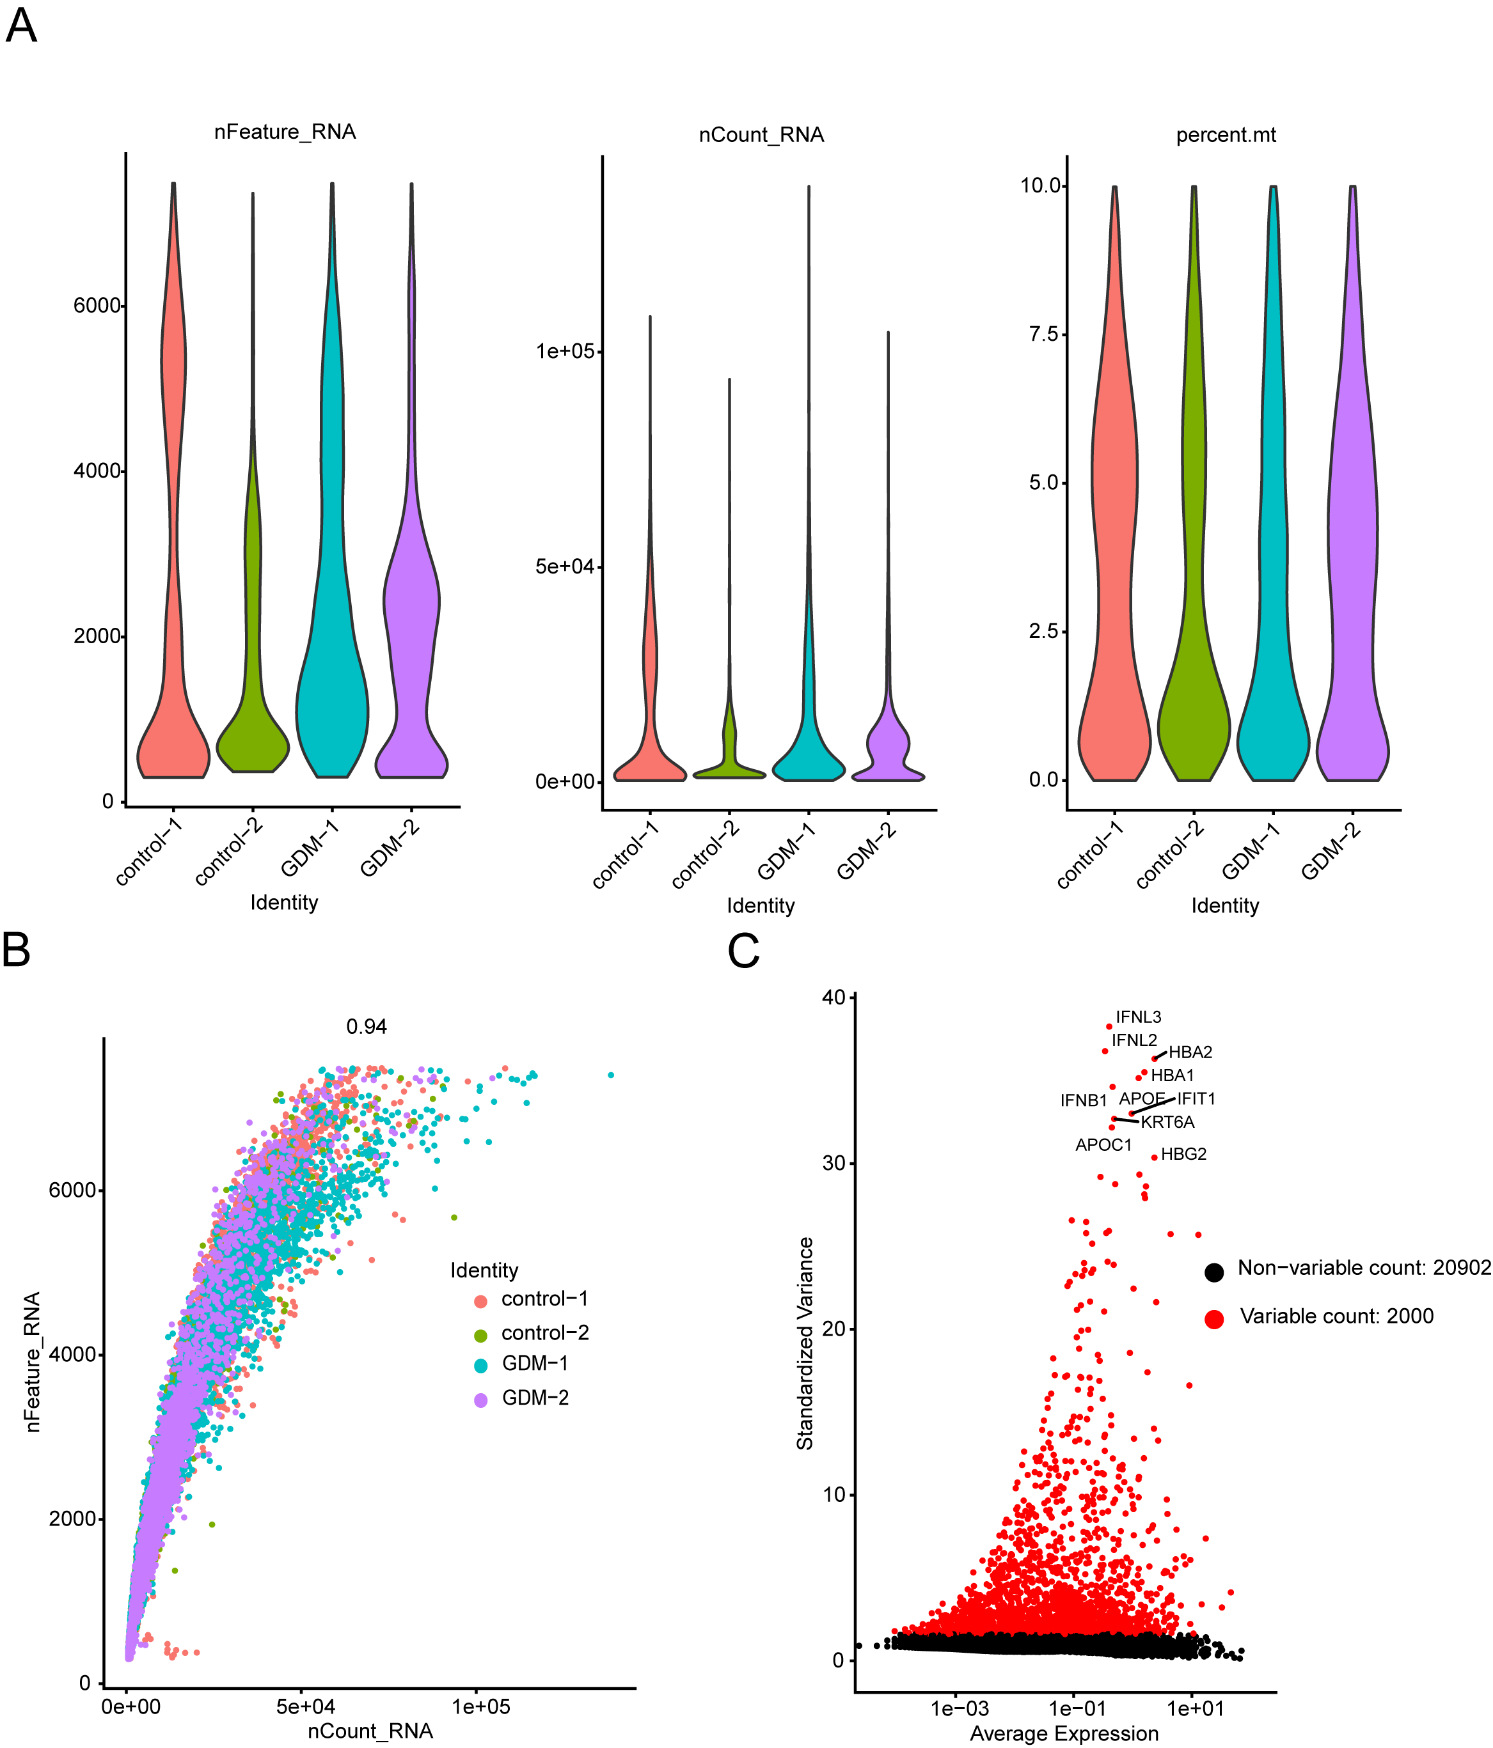


Supplementary Figure 1. ScRNA analysis of the human placenta in GDM. (A) Violin plots showing the features, counts and mitochondrial gene percentage of 4 samples in GDM and control groups. (B) Dot plot showing the correlation between genes and counts in 4 samples. (C) Dot plot showing 2000 highly variable genes (HVGs). The top 10 HVGs were labeled.


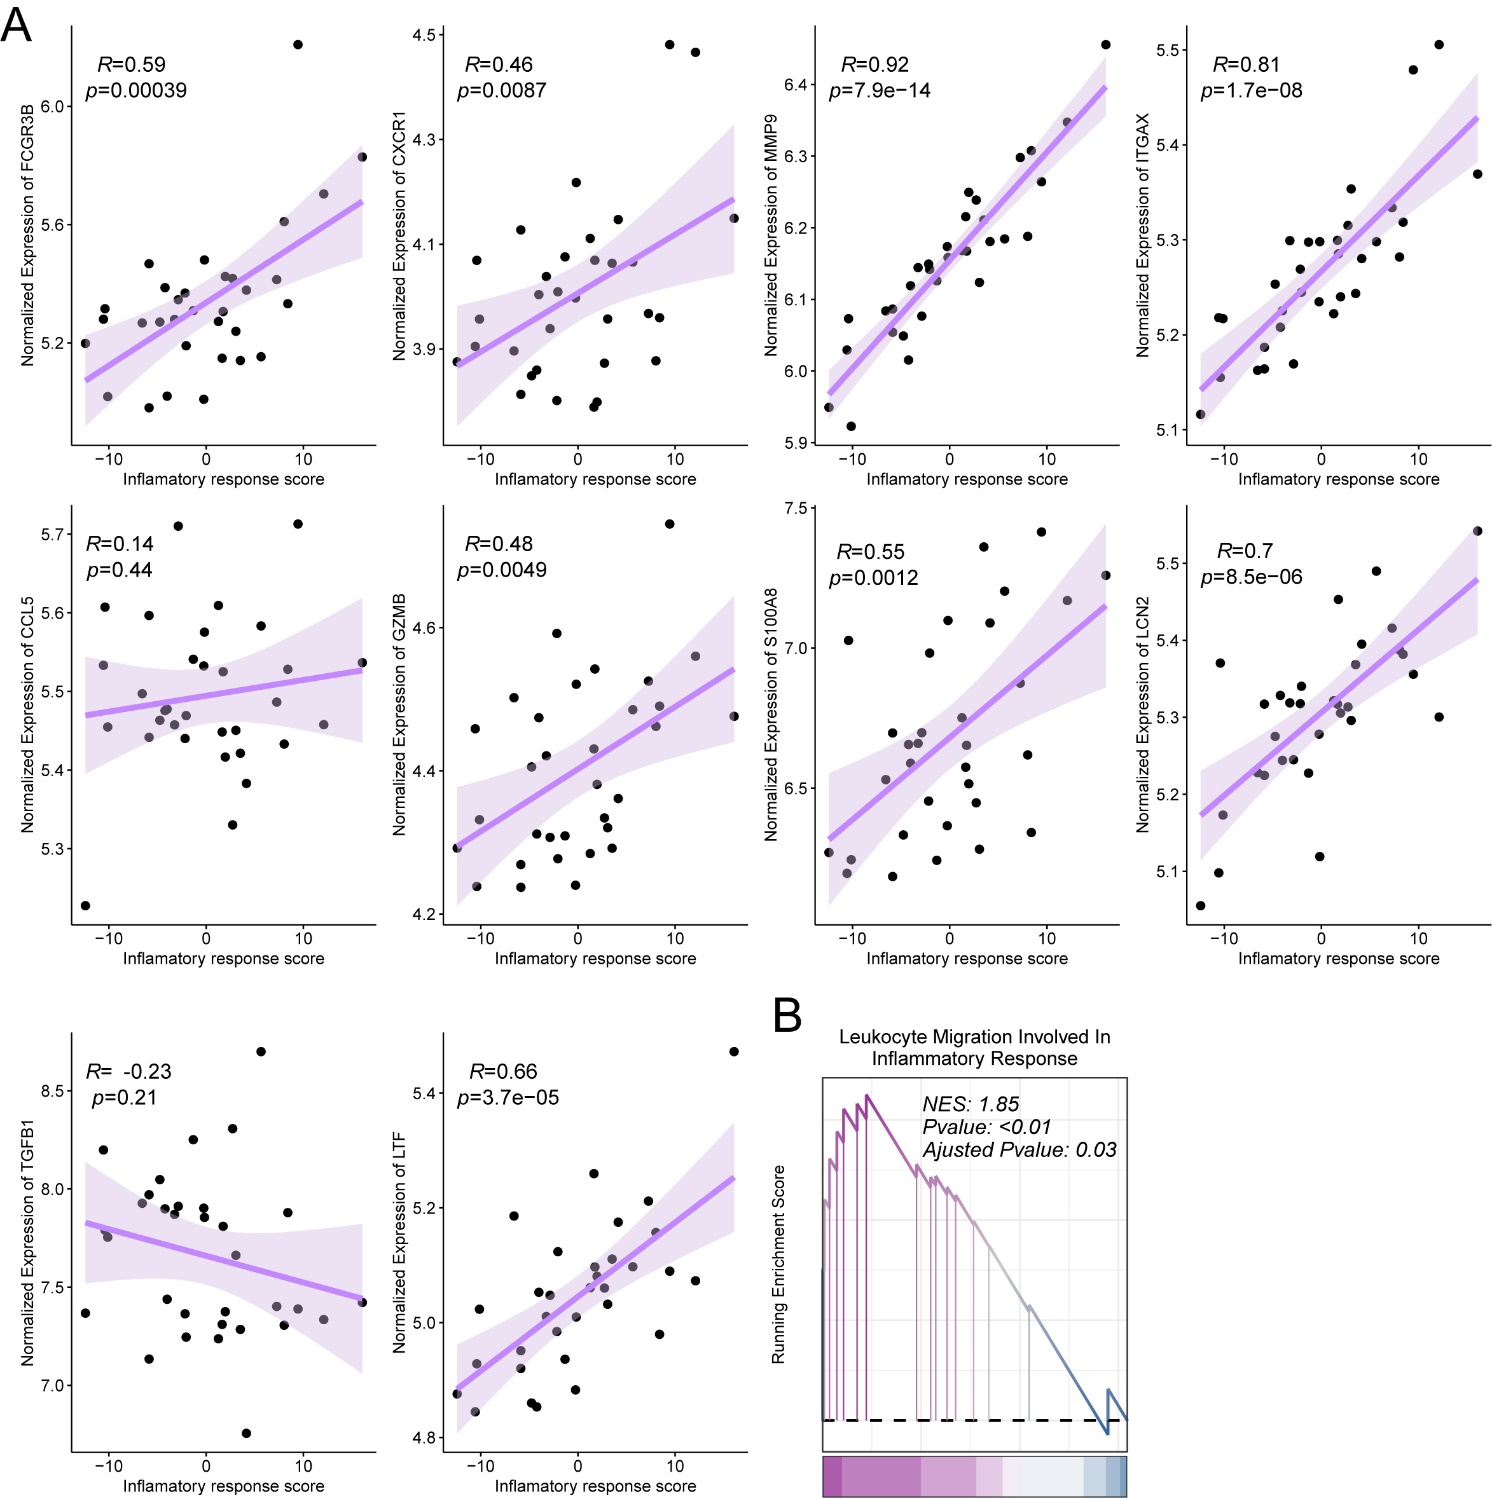


Supplementary Figure 2. **The correlation between 10 hub genes and inflammatory response.** (A) Scatterplot with the inflammatory response score on the x-axis and the normalized expression of 10 hub genes (FCGR3B, CXCR1, MMP9, ITGAX, CCL5, GZMB, S100A8, LCN2, TGFB1 and LTF) on the y-axis is shown. (B) Gene set enrichment analysis (GSEA) plot showing the up-regulated pathway enrichment in inflammatory response related pathway (high hub_gene score vs low hub_gene score).

**Supplementary Table 1. Drug candidates combined with hub genes.**

| **Drug name** | **Padj** | **Combined score** | **Genes** |
| --- | --- | --- | --- |
| Probucol | 8.77E-04 | 5554.53 | TGFB1; MMP9 |
| CHEMBL55802 | 0.00121 | 4094.01 | TGFB1; MMP9 |
| TITANIUM | 0.00121 | 4094.01 | TGFB1; MMP9 |
| benazepril | 0.00158 | 2987.15 | TGFB1; MMP9 |
| TRIAMCINOLONE  ACETONIDE | 0.00158 | 2791.90 | TGFB1; CCL5 |
| cytochalasin D | 0.00158 | 2791.90 | CXCR1; MMP9 |
| POTASSIUM PERSULFATE | 0.00180 | 2463.82 | LCN2; LTF |
| FEXOFENADINE  HYDROCHLORIDE | 0.00207 | 2085.58 | CCL5; MMP9 |
| Hydroxytyrosol | 0.00207 | 2085.58 | CCLS; MMP9 |
| trimethoprim BOSS | 1.41E-O5 | 1897.13 | CXCR1; CCL5; LCN2; MMP9; LTF |

**Supplementary Table 2. Cell numbers of each cell type.**

| **Sample** | **Villous cytotrophoblast cells** | **Extravillous trophoblast cells** | **Syncytiotrophoblast cells** | **NK cells** | **T cells** | **Monocytes** | **Macrophages** | **Granulocytes** | **Myelocytes** | **B cells** | **undefined** |
| --- | --- | --- | --- | --- | --- | --- | --- | --- | --- | --- | --- |
| control-1 | 2921 | 255 | 188 | 192 | 187 | 248 | 121 | 1439 | 1225 | 24 | 39 |
| control-2 | 446 | 140 | 54 | 114 | 156 | 279 | 1275 | 1520 | 428 | 20 | 140 |
| GDM-1 | 2813 | 1958 | 118 | 193 | 290 | 286 | 572 | 343 | 94 | 59 | 214 |
| GDM-2 | 918 | 281 | 61 | 132 | 390 | 132 | 2086 | 1049 | 274 | 27 | 68 |

| **Cell cluster** | **Up-regulated** | **Down-regulated** | **Total DEGs** |
| --- | --- | --- | --- |
| Villous cytotrophoblast cells | 148 | 365 | 513 |
| Extravillous trophoblast cells | 70 | 201 | 271 |
| Syncytiotrophoblast cells | 60 | 49 | 109 |
| NK cells | 60 | 69 | 129 |
| T cells | 50 | 53 | 103 |
| Monocytes | 157 | 311 | 468 |
| Macrophages | 234 | 554 | 788 |
| Granulocytes | 122 | 495 | 617 |
| Myelocytes | 84 | 78 | 162 |
| B cells | 4 | 44 | 48 |
| undefined | 3 | 89 | 92 |

**Supplementary Table 3. The numbers of DEGs in cell clusters (GDM vs Control).**

**Supplementary Table 4. The enrolled datasets in the current study.**

| **Datasets** | **Type** | **Species (Origin)** | **Sample size (control/GDM)** | **Cells(control/GDM)** |
| --- | --- | --- | --- | --- |
| GSE173193 | Single cell RNA sequencing | Homo sapiens (placenta) | 2/2 | 11411/12358 |
| GSE154414 | RNA sequencing | Homo sapiens (placenta) | 4/4 | - |
| GSE70493 | Microarray | Homo sapiens (placenta) | 31/32 | - |

**Supplementary Table 5. The clinical data of GSE154414 dataset.**

| **ID** | **Species (Origin)** | **Gestational age** | **Patient diagnosis** |
| --- | --- | --- | --- |
| GSM4670790 | Homo sapiens | 37.2 | gestational diabetes mellitus |
| GSM4670791 | Homo sapiens | 38.3 | gestational diabetes mellitus |
| GSM4670792 | Homo sapiens | 38.2 | gestational diabetes mellitus |
| GSM4670793 | Homo sapiens | 37.5 | gestational diabetes mellitus |
| GSM4670794 | Homo sapiens | 37.6 | healthy control |
| GSM4670795 | Homo sapiens | 38.2 | healthy control |
| GSM4670796 | Homo sapiens | 38.4 | healthy control |
| GSM4670797 | Homo sapiens | 38.5 | healthy control |
